# Supplementary material for: A supported polymeric organic framework composed of dual electrocatalytically active sites for high-performance carbon dioxide electroreduction
Source: Royal Society of Chemistry journal article supplement (doi:10.1039/d3qi00589e), 2023-01-01
Supplement: d3qi00589e1.pdf [file d3qi00589e1.pdf]

## Supplementary Information for

### **Supported Polymeric Organic Framework Composed of Dual Electrocatalytic Active Sites for High-Performance Carbon Dioxide Electroreduction**

Shengsheng Huang<sup>a</sup>, Qizhe He<sup>a</sup>, Hongwei Li<sup>a</sup>, Jinjie Qian<sup>b,\*</sup>, Wei Xu<sup>a</sup>, Ting-Ting Li<sup>a,\*</sup>

<sup>a</sup>School of Materials Science and Chemical Engineering, Ningbo University, Ningbo, 315211, China.

<sup>b</sup>College of Chemistry and Materials Engineering, Wenzhou University, Wenzhou, 325000, China.

\*Corresponding author. E-mail addresses: [jinjieqian@wzu.edu.cn](mailto:jinjieqian@wzu.edu.cn) (J. Qian), [litingting@nbu.edu.cn](mailto:litingting@nbu.edu.cn) (T.-T. Li).

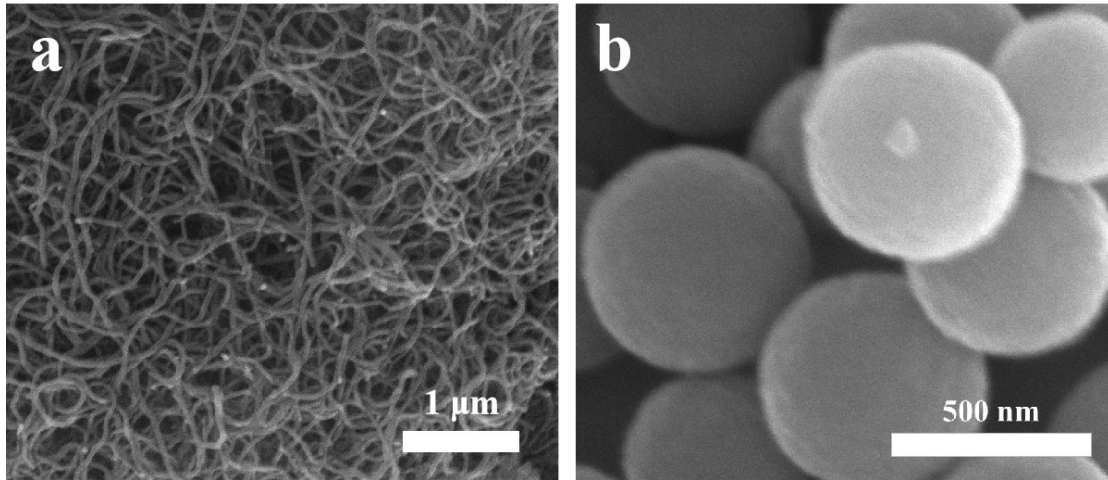

**Fig. S1.** SEM images of (a) CoPOF-Bpy@CNT and (b) CoPOF-Bpy.

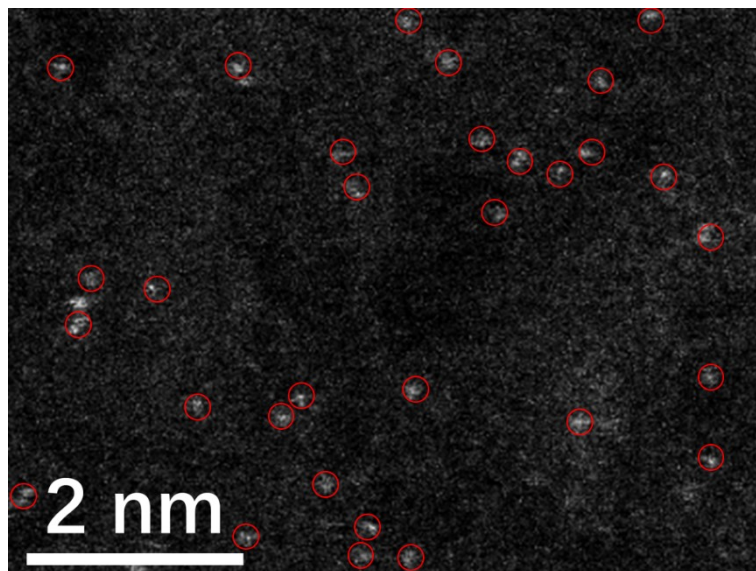

**Fig. S2.** AC HAADF-STEM image of CoPOF-Bpy@CNT, partial of single Co atoms are highlighted by red circles.

**Table S1** The Co contents of the samples.

| Sample         | Co wt% |
|----------------|--------|
| CoPOF-Bda@CNT  | 1.9    |
| CoPOF-Bpda@CNT | 1.8    |
| CoPOF-Bpy@CNT  | 3.7    |

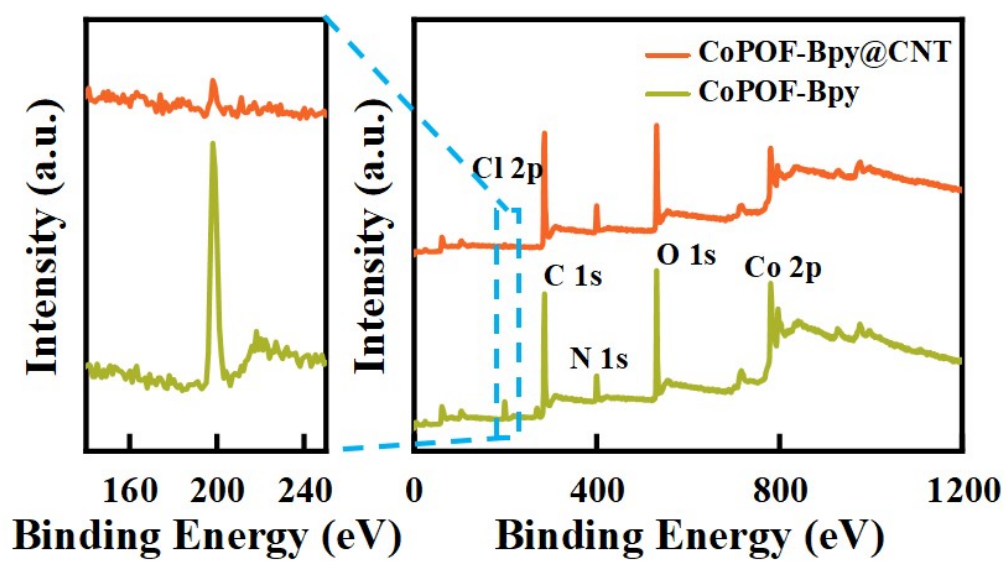

**Fig. S3.** XPS spectra of CoPOF-Bpy@CNT and CoPOF-Bpy.

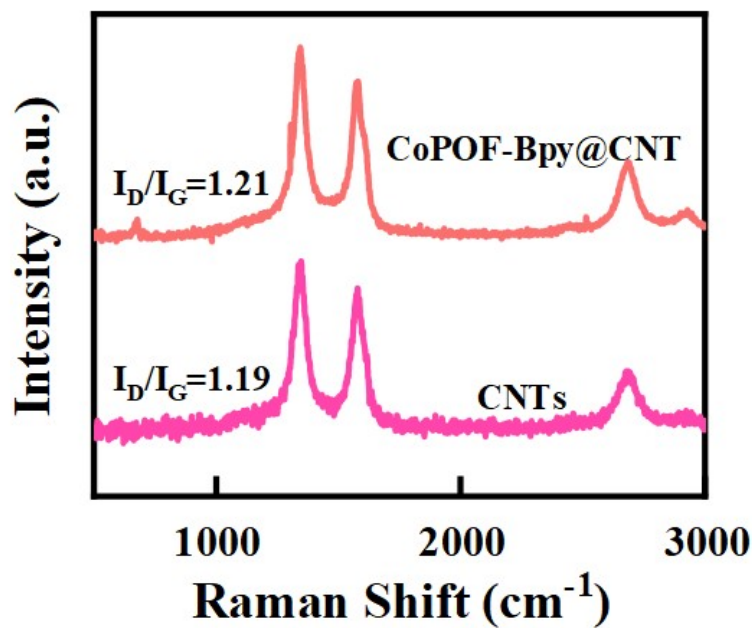

Fig. S4. Raman spectra of CoPOF-Bpy@CNT and CNTs.

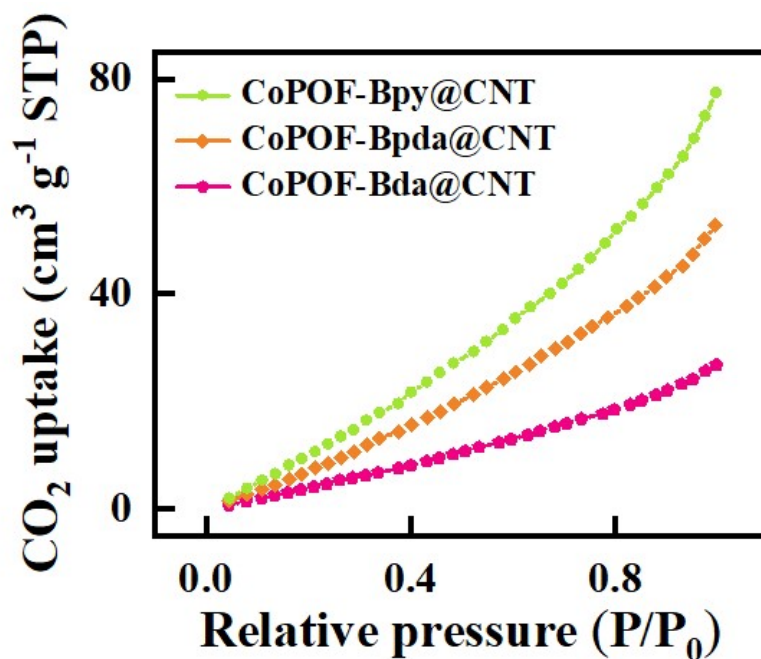

Fig. S5. CO<sub>2</sub> adsorption isotherms of CoPOF-Bpy@CNT, CoPOF-Bpda@CNT, and CoPOF-Bda@CNT at 298 K.

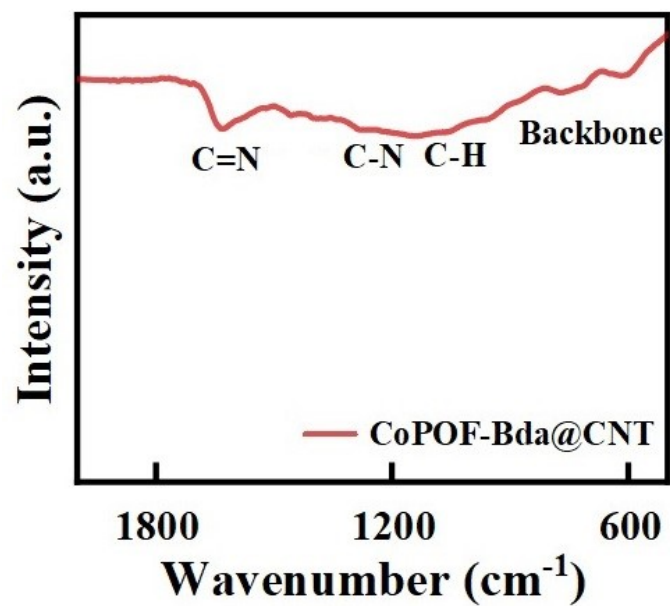

Fig. S6. FT-IR spectrum of CoPOF-Bda@CNT.

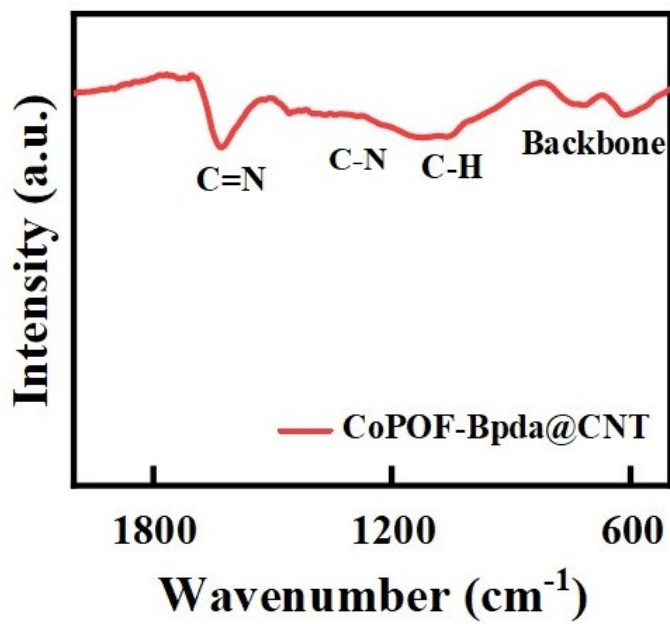

Fig. S7. FT-IR spectrum of CoPOF-Bpda@CNT.

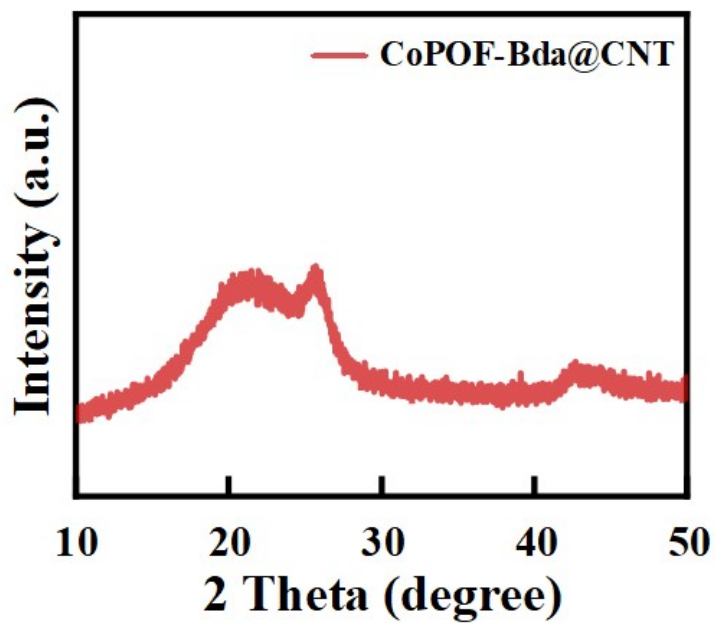

Fig. S8. XRD patterns of CoPOF-Bda@CNT.

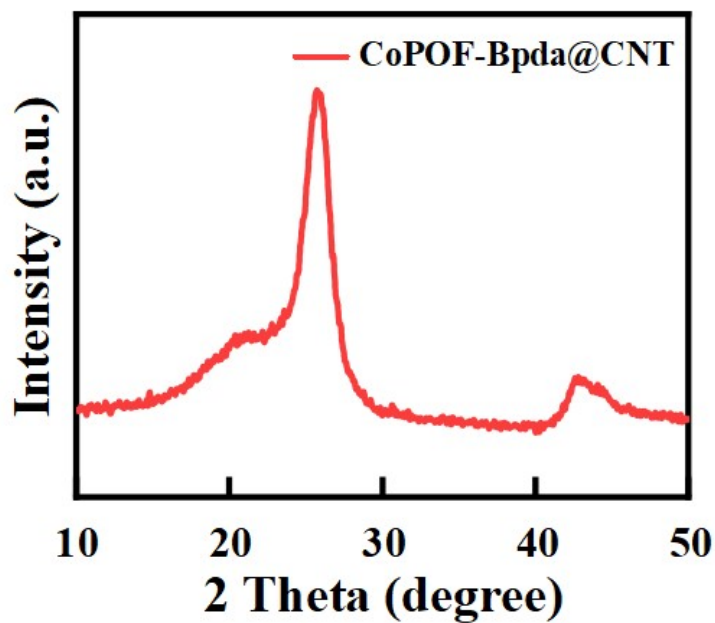

Fig. S9. XRD patterns of CoPOF-Bpda@CNT.

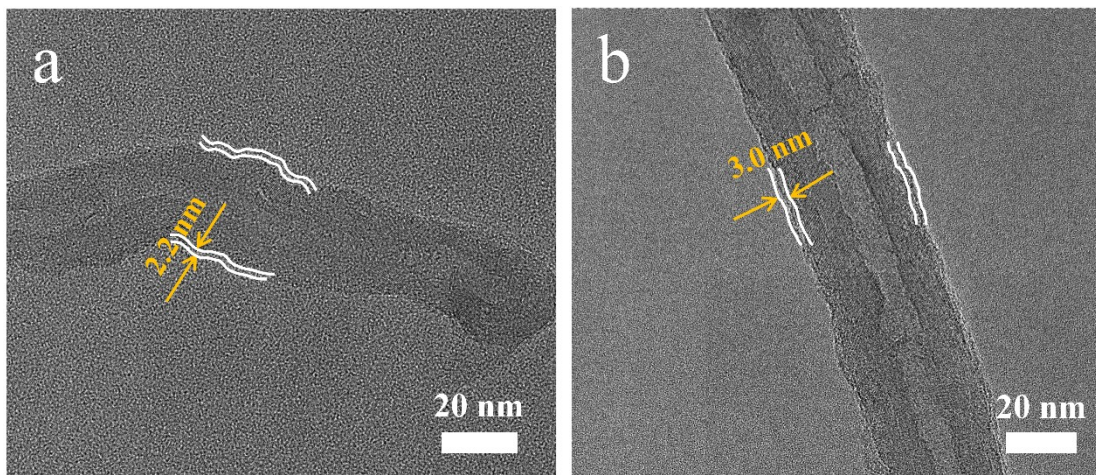

Fig. S10. TEM images of (a) CoPOF-Bda@CNT and (b) CoPOF-Bpda@CNT.

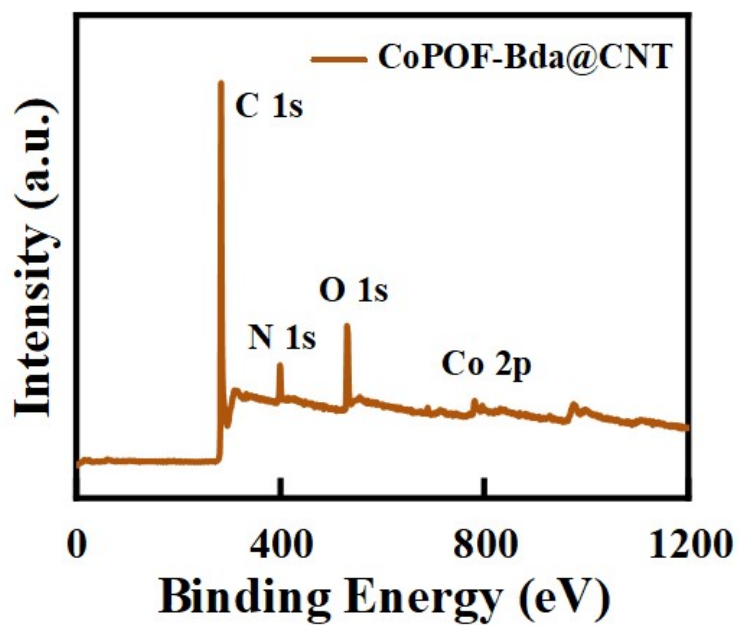

Fig. S11. XPS spectrum of CoPOF-Bda@CNT.

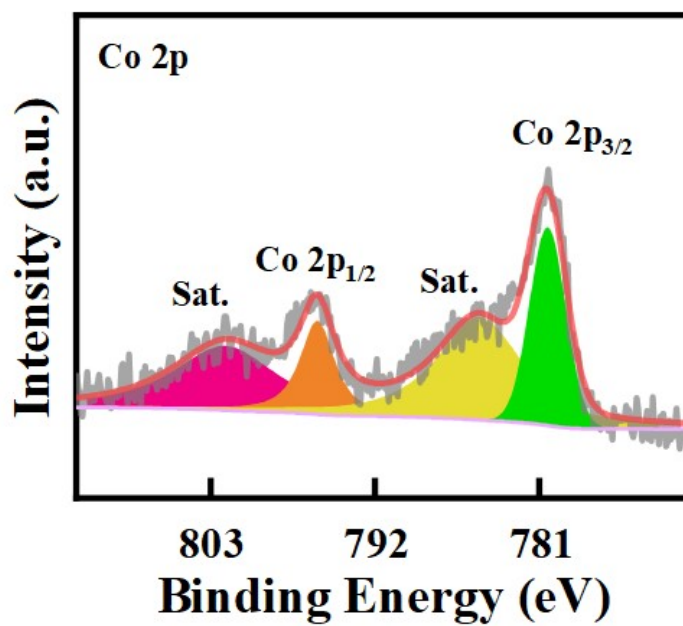

Fig. S12. Co 2p XPS spectrum of CoPOF-Bda@CNT.

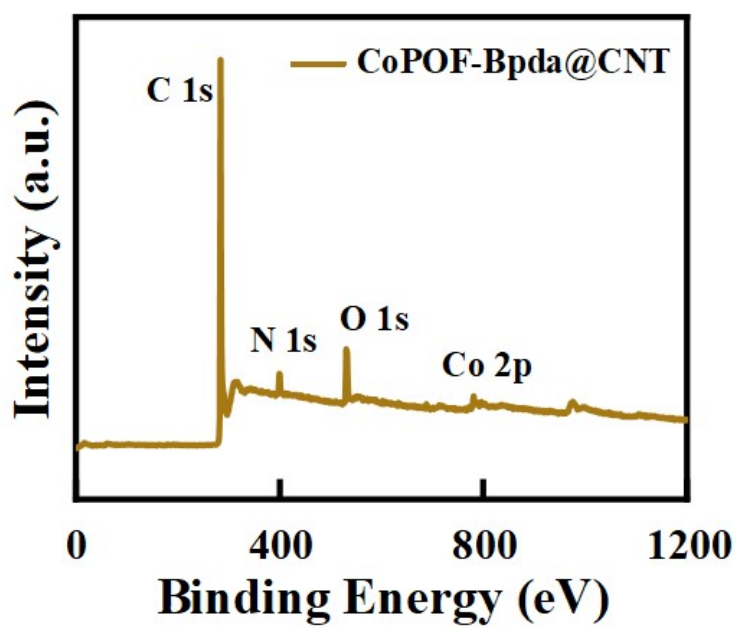

Fig. S13. XPS spectrum of CoPOF-Bpda@CNT.



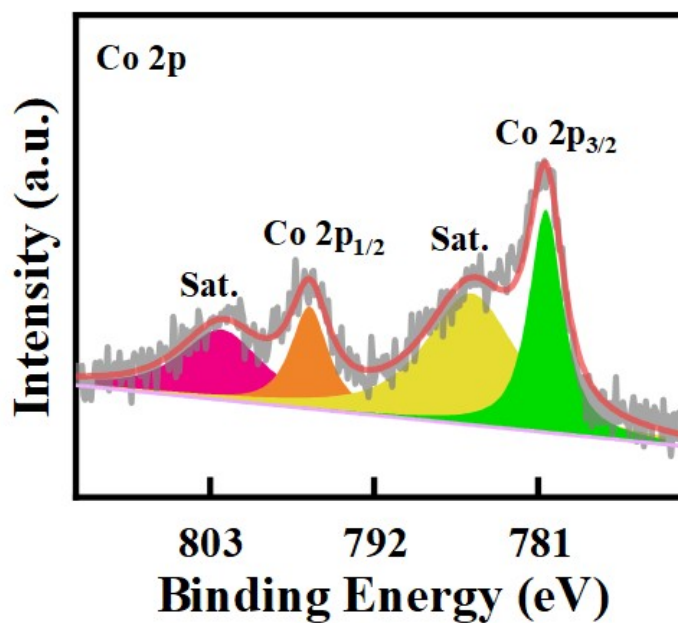

Fig. S14. Co 2p XPS spectrum of CoPOF-Bpda@CNT.

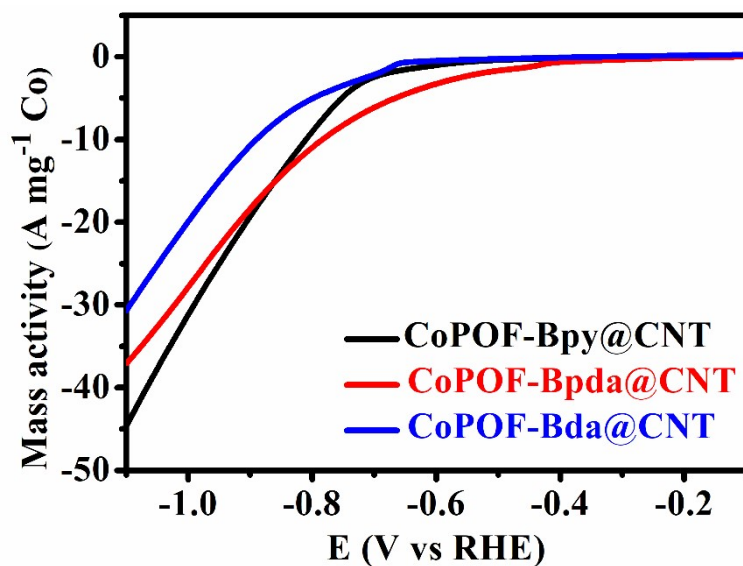

Fig. S15. Mass activities of CoPOF-Bpy@CNT, CoPOF-Bda@CNT, and CoPOF-Bpda@CNT by normalizing the current densities with respect to the Co contents.

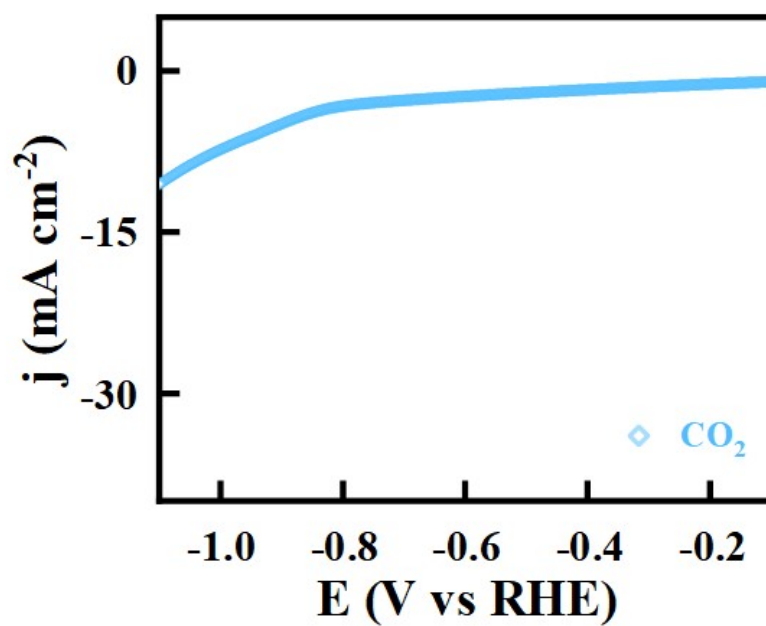

Fig. S16. LSV plot of pure CNTs in a  $\text{CO}_2$ -saturated  $\text{KHCO}_3$  solution.

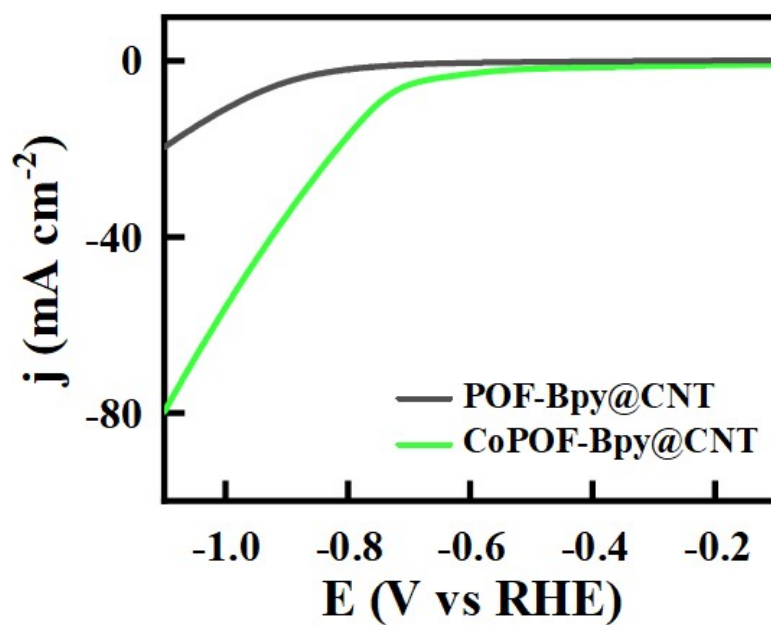

Fig. S17. LSV plots of CoPOF-Bpy@CNT and POF-Bpy@CNT in a  $\text{CO}_2$ -saturated  $\text{KHCO}_3$  solution.

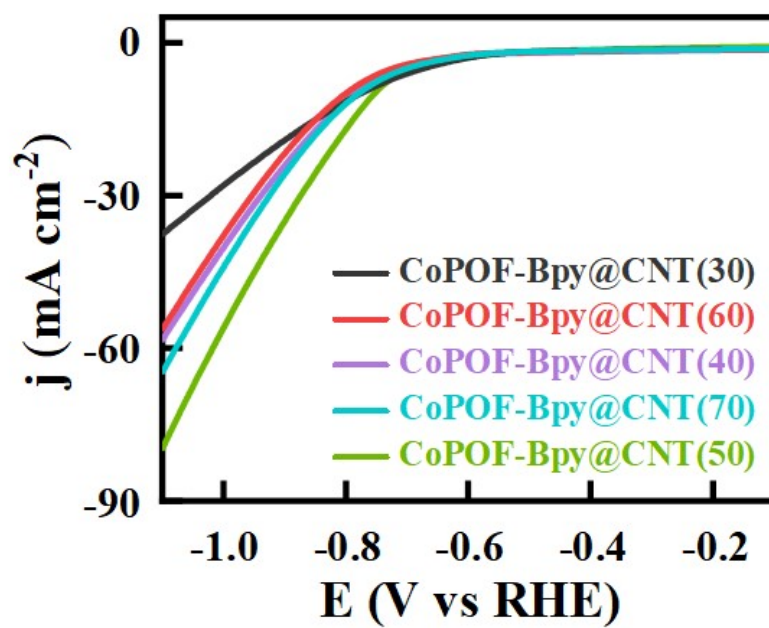

**Fig. S18.** LSV plots of CoPOF-Bpy@CNT(X) in a  $\text{CO}_2$ -saturated  $\text{KHCO}_3$  solution.

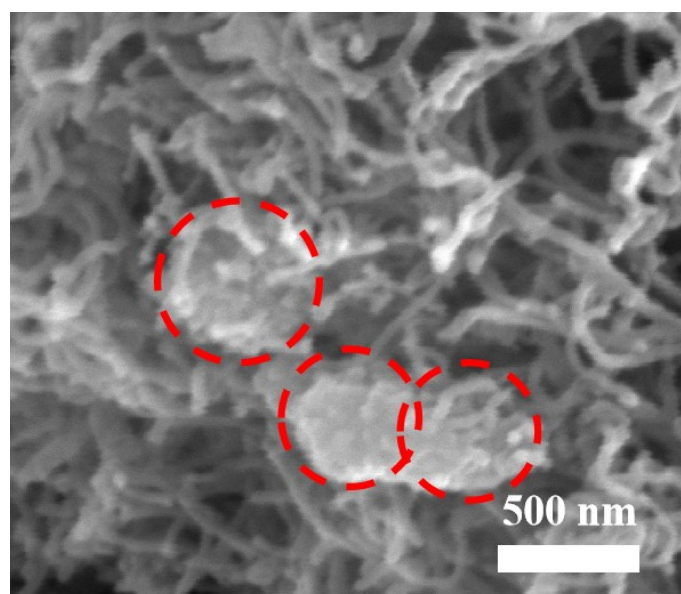

**Fig. S19.** SEM image of CoPOF-Bpy@CNT(30).

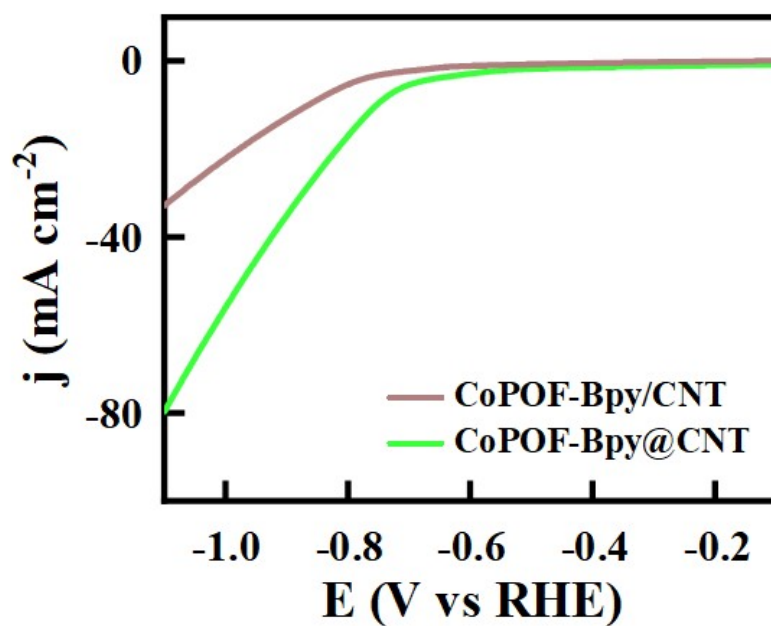

**Fig. S20.** LSV plots of CoPOF-Bpy@CNT and CoPOF-Bpy/CNT in a CO<sub>2</sub>-saturated KHCO<sub>3</sub> solution.

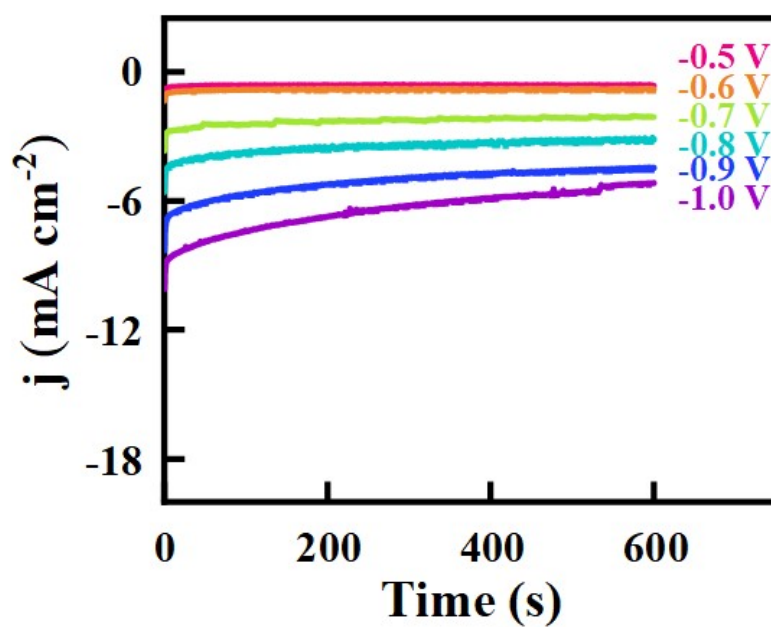

**Fig. S21.** Time-dependent total catalytic current densities ( $j_{\text{total}} \sim t$ ) of CoPOF-Bda@CNT in a wide potential range from -0.5 V to -1.0 V vs RHE.

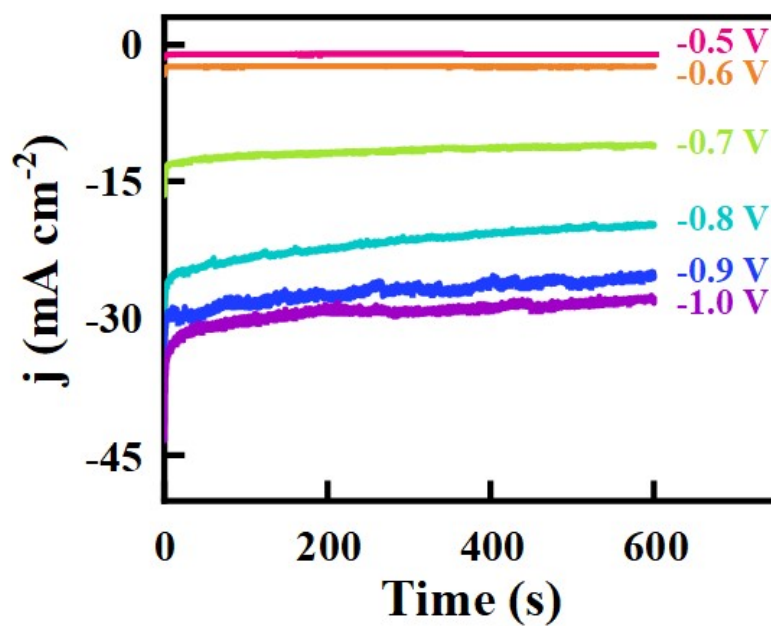

**Fig. S22.** Time-dependent total catalytic current densities ( $j_{\text{total}} \sim t$ ) of CoPOF-Bpda@CNT in a wide potential range from  $-0.5$  V to  $-1.0$  V vs RHE.

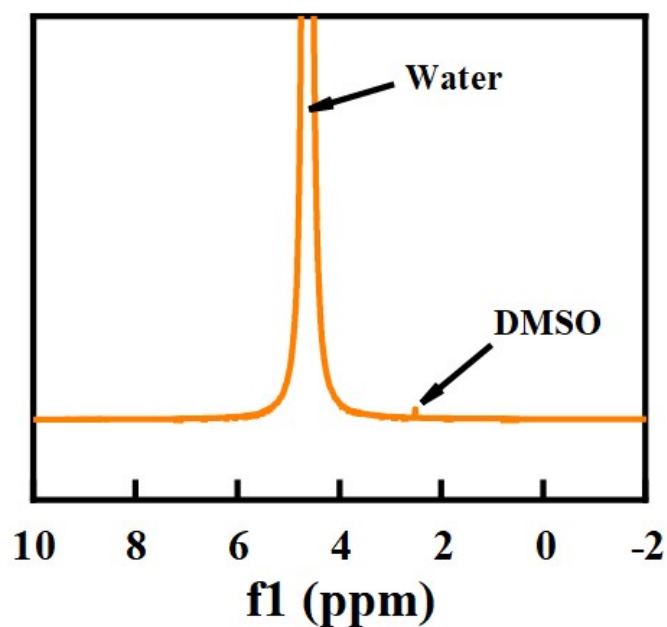

**Fig. S23.**  $^1\text{H}$  NMR spectrum of liquid product after long-term  $\text{CO}_2\text{RR}$  for CoPOF-Bpy@CNT at  $-0.7$  V vs RHE in  $\text{CO}_2$ -saturated  $0.5$  M  $\text{KHCO}_3$  solution.

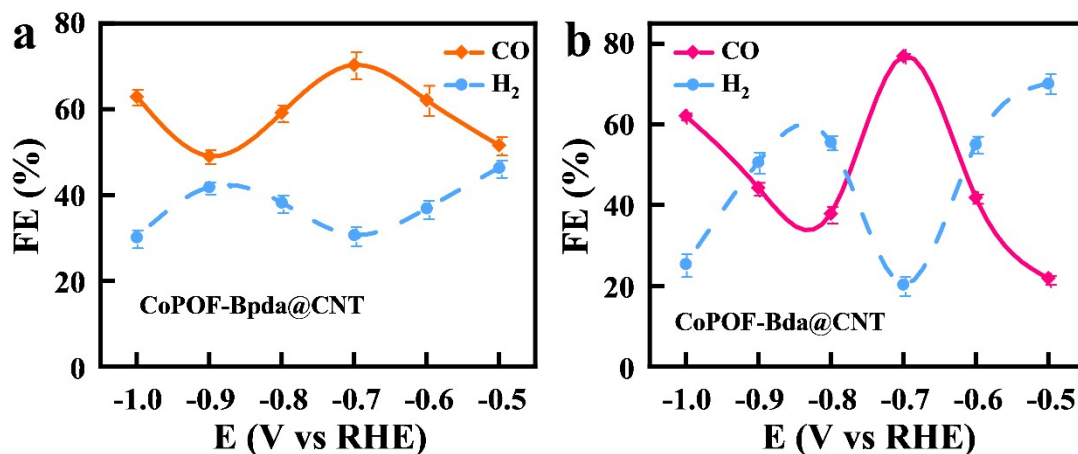

Fig. S24.  $FE_{CO}$  and  $FE_{H_2}$  of (a) CoPOF-Bpda@CNT and (b) CoPOF-Bda@CNT at different applied potentials.

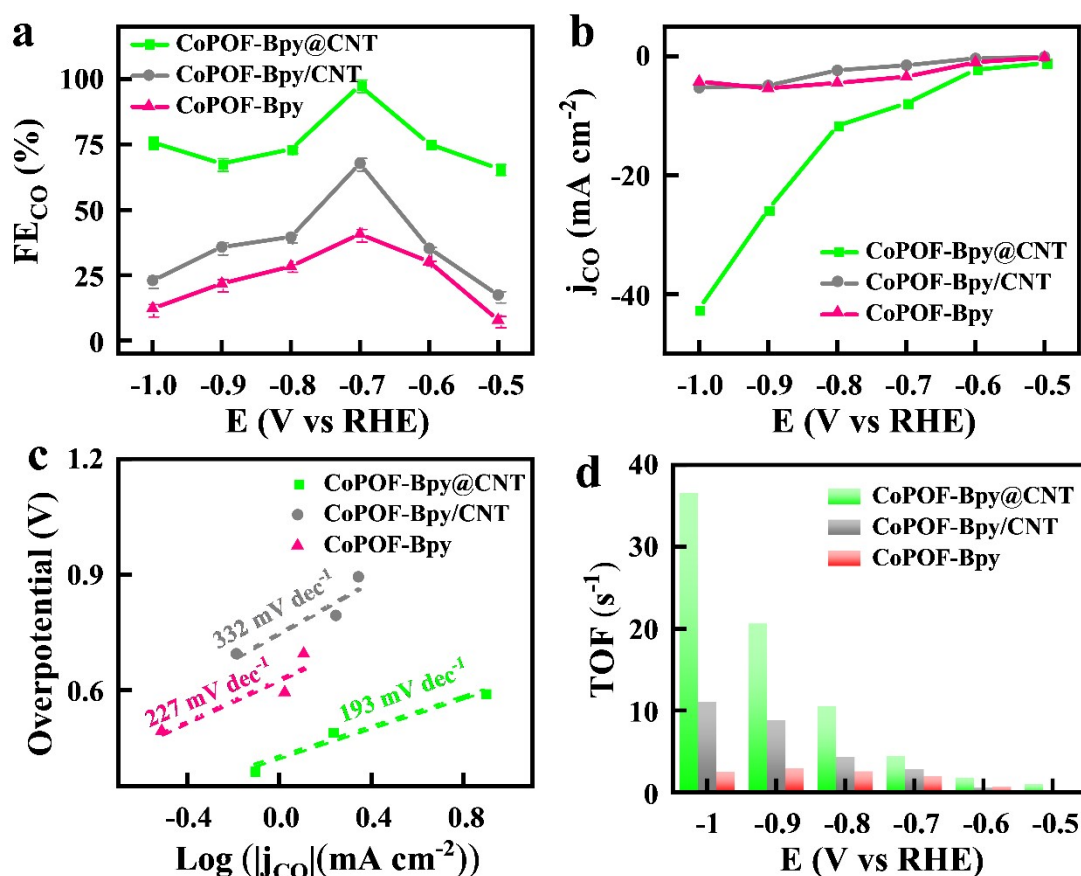

Fig. S25. (a)  $FE_{CO}$  of CoPOF-Bpy@CNT, CoPOF-Bpy, and CoPOF-Bpy/CNT at different applied potentials; (b) Partial current densities of CO, (c) Tafel plots, and (d) TOF values of CoPOF-Bpy@CNT, CoPOF-Bpy, and CoPOF-Bpy/CNT.

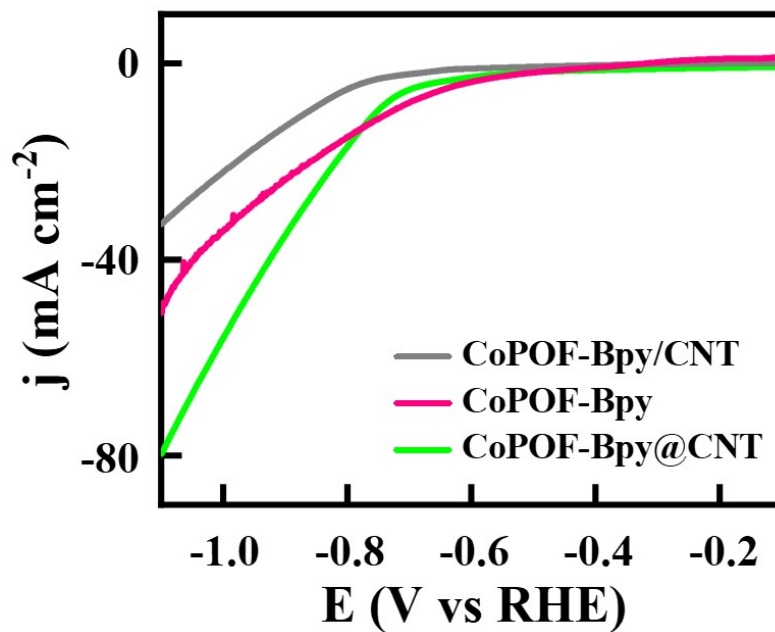

**Fig. S26.** LSV plots of CoPOF-Bpy@CNT, CoPOF-Bpy, and CoPOF-Bpy/CNT in a  $\text{CO}_2$ -saturated 0.5 M  $\text{KHCO}_3$  solution.

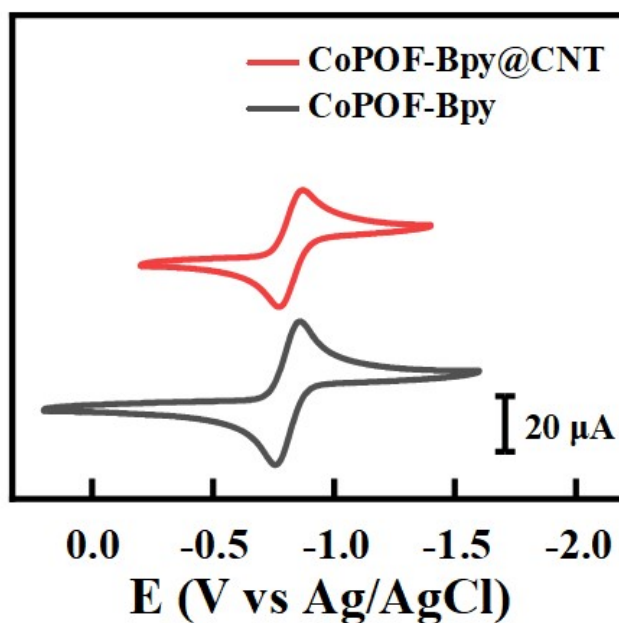

**Fig. S27.** CV plots of CoPOF-Bpy@CNT and CoPOF-Bpy in a 0.1 M  $\text{NBu}_4\text{PF}_6/\text{DMF}$  solution under nitrogen atmosphere with a scan rate of  $100 \text{ mV s}^{-1}$ .

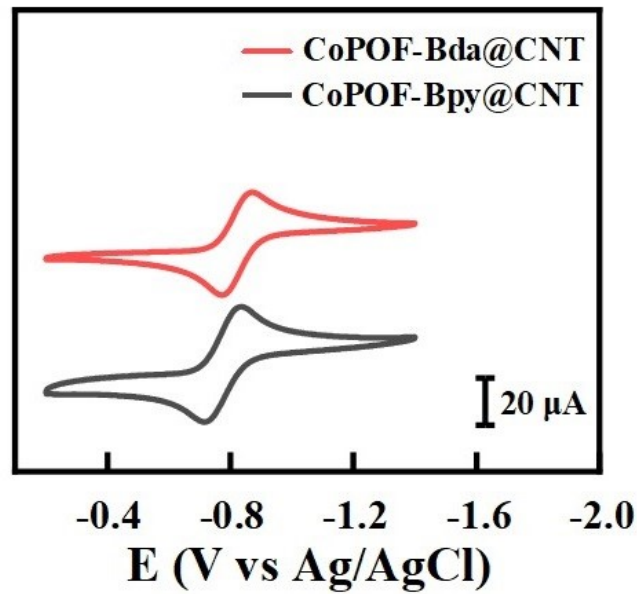

**Fig. S28.** CV plots of CoPOF-Bpy@CNT and CoPOF-Bda@CNT in a 0.1 M  $\text{NBu}_4\text{PF}_6/\text{DMF}$  solution under nitrogen atmosphere with a scan rate of  $100 \text{ mV s}^{-1}$ .

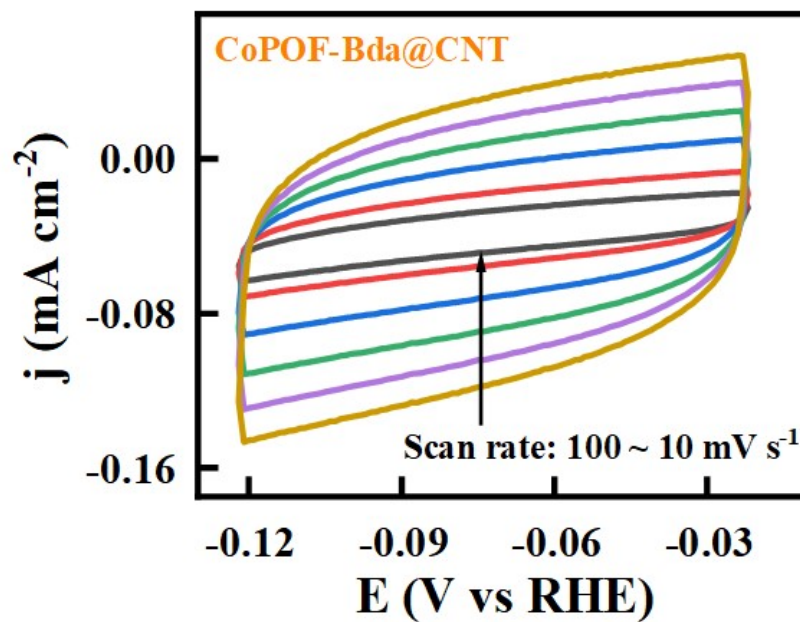

**Fig. S29.** CV plots of CoPOF-Bda@CNT in the non-Faradaic region with various scan rates ( $10 \sim 100 \text{ mV s}^{-1}$ ).



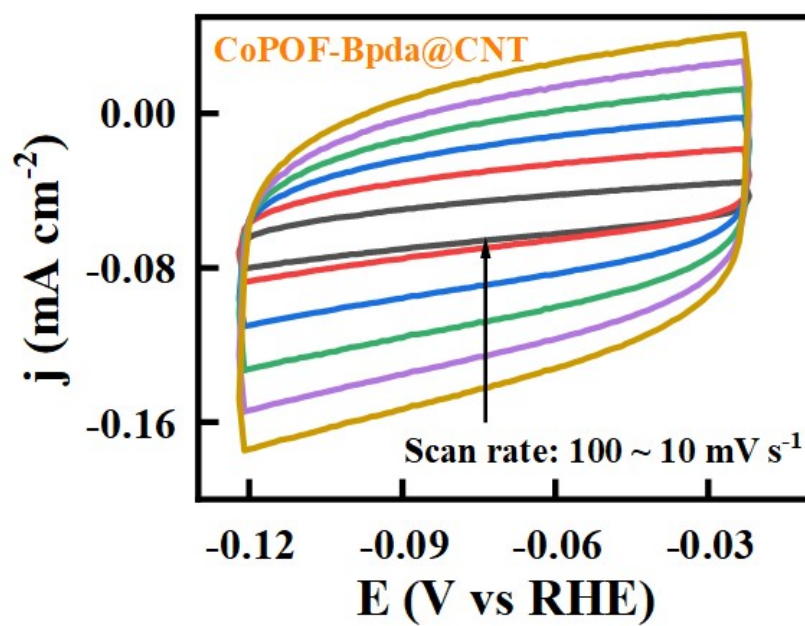

**Fig. S30.** CV plots of CoPOF-Bpda@CNT in the non-Faradaic region with various scan rates (10 ~ 100  $\text{mV s}^{-1}$ ).

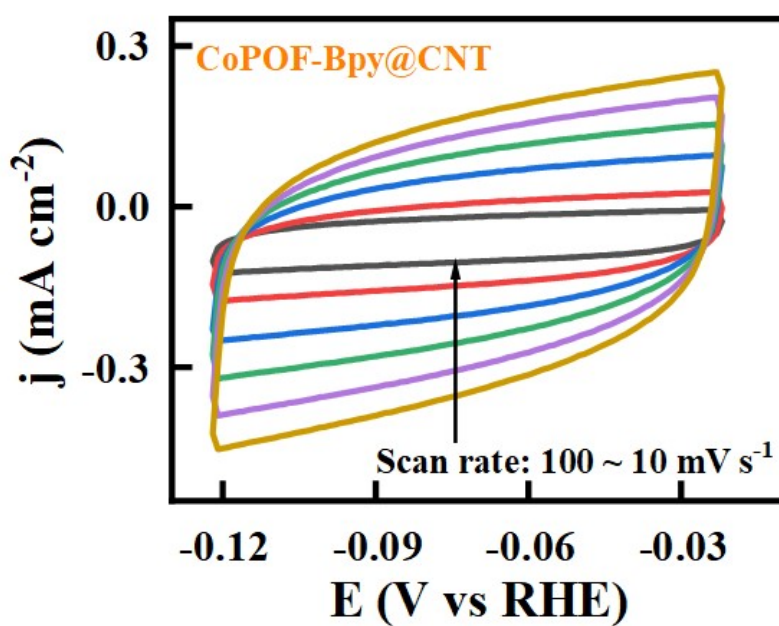

**Fig. S31.** CV plots of CoPOF-Bpy@CNT in the non-Faradaic region with various scan rates (10 ~ 100  $\text{mV s}^{-1}$ ).

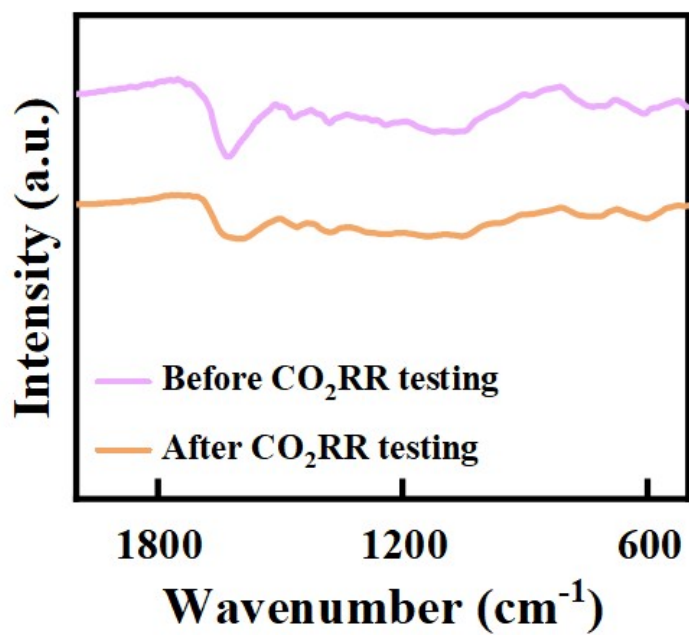

**Fig. S32.** The comparison of FT-IR spectra of CoPOF-Bpy@CNT before and after long-term CO<sub>2</sub>RR.

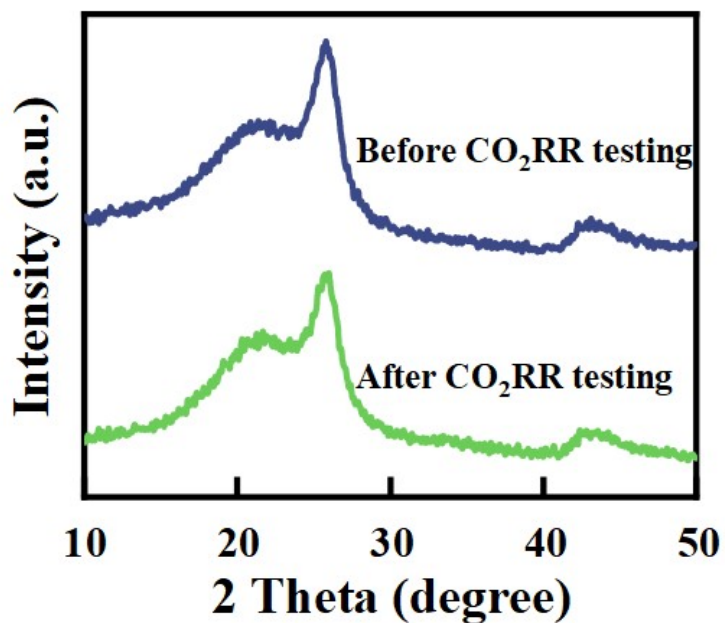

**Fig. S33.** The comparison of XRD patterns of CoPOF-Bpy@CNT before and after long-term CO<sub>2</sub>RR.

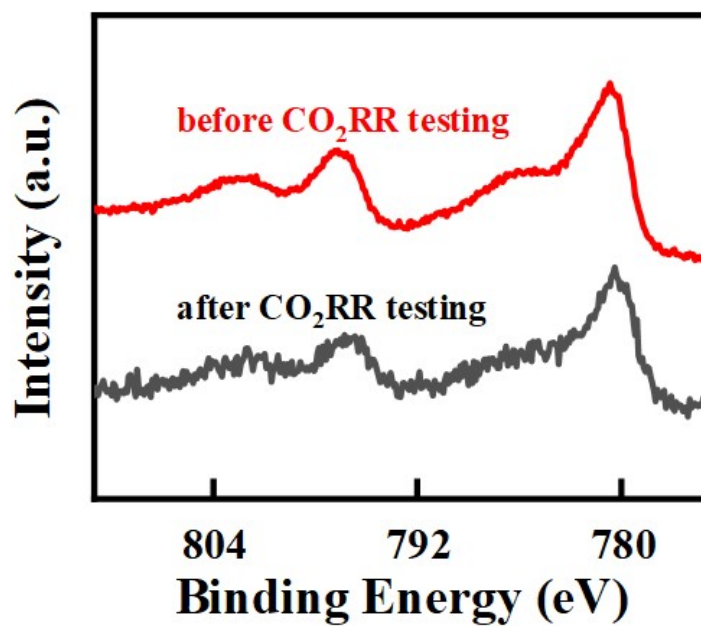

**Fig. S34.** The comparison of Co 2p XPS spectra of CoPOF-Bpy@CNT before and after long-term CO<sub>2</sub>RR.

**Table S2** Comparison of the electrocatalytic CO<sub>2</sub>RR performance of recently reported CoPor-based POFs electrocatalysts.

| Catalysts                          | Electrolyte             | V vs. RHE | FE <sub>CO</sub> / % | j <sub>CO</sub> / mA cm <sup>-2</sup> | TOF / s <sup>-1</sup>            | Ref.      |
|------------------------------------|-------------------------|-----------|----------------------|---------------------------------------|----------------------------------|-----------|
| CoPOF-Bpy@CNT                      |                         |           | 97.5                 | 7.9                                   | 36.6 at -1.0 V                   |           |
| CoPOF-Bpda@CNT                     | 0.5 M KHCO <sub>3</sub> | -0.7      | 70.3                 | 5.7                                   | 26 at -1.0 V                     | This work |
| CoPOF-Bda@CNT                      |                         |           | 76.8                 | 1.6                                   | 13.7 at -1.0 V                   |           |
| COF-367-Co                         |                         |           | 90                   | 3.3                                   | 0.53                             |           |
| COF-367-Co(1%)                     | 0.5 M KHCO <sub>3</sub> | -0.67     | 90                   | 0.45                                  | 2.6                              | 1         |
| COF-366-Co@CNT                     |                         |           | 92                   | 6.8                                   | /                                |           |
| COF-366-(OMe) <sub>2</sub> -Co@CNT | 0.5 M KHCO <sub>3</sub> | -0.68     | 94                   | 7.3                                   | 11877 h <sup>-1</sup> at -0.77 V | 2         |
| COF-366-(OH) <sub>2</sub> -Co@CNT  |                         |           | 90                   | 6.0                                   | /                                |           |
| COF-366-(F) <sub>4</sub> -Co@CNT   |                         |           | 91                   | 5.7                                   | /                                |           |
| CoCoPCP                            | 0.5 M KHCO <sub>3</sub> | -0.55     | 82                   | 1.5                                   | 0.9                              |           |
| CoCoPCP/CNTs                       |                         |           | 94                   | 8.1                                   | 2.4                              | 3         |
| MWCNT-Por-COF-Co                   | 0.5 M KHCO <sub>3</sub> | -0.6      | 99.3                 | 18.77 at -1.0 V                       | 72 at -1.0 V                     | 4         |
| CoP@CNT                            |                         |           | 98                   |                                       | 2.2                              |           |
| CoP-Ph@CNT                         | 0.5 M KHCO <sub>3</sub> | -0.57     | 82                   | /                                     | 0.9                              | 5         |
| CoP-F@CNT                          |                         |           | 12                   |                                       | 0.1                              |           |

## References

1. S. Lin, C. S. Diercks, Y.-B. Zhang, N. Kornienko, E. M. Nichols, Y. Zhao, A. R. Paris, D. Kim, P. Yang, O. M. Yaghi and C. J. Chang, Covalent organic frameworks comprising cobalt porphyrins for catalytic CO<sub>2</sub> reduction in water, *Science*, 2015, **349**, 1208–1203.
2. Y. Lu, J. Zhang, W. Wei, D.-D. Ma, X.-T. Wu and Q.-L. Zhu, Efficient carbon dioxide electroreduction over ultrathin covalent organic framework nanolayers with isolated cobalt porphyrin units, *ACS Appl. Mater. Interfaces*, 2020, **12**, 37986–37992.
3. T. Wang, L. Xu, Z. Chen, L. Guo, Y. Zhang, R. Li and T. Peng, Central site regulation of cobalt porphyrin conjugated polymer to give highly active and selective CO<sub>2</sub> reduction to CO in aqueous solution, *Appl. Catal. B*, 2021, **291**, 120128.
4. H. Dong, M. Lu, Y. Wang, H.-L. Tang, D. Wu, X. Sun and F.-M. Zhang, Covalently anchoring covalent organic framework on carbon nanotubes for highly efficient electrocatalytic CO<sub>2</sub> reduction, *Appl. Catal. B*, 2022, **303**, 120897.
5. Y. Wang, X.-P. Zhang, H. Lei, K. Guo, G. Xu, L. Xie, X. Li, W. Zhang, U.-P. Apfel and R. Cao, Tuning electronic structures of covalent Co porphyrin

polymers for electrocatalytic CO<sub>2</sub> reduction in aqueous solution, *CCS Chem.*, 2022, 4, 2959–2967.
